# Supplementary material
Source: publisher figshare collection journal article supplement (https://springernature.figshare.com/ndownloader/files/18540236)
Supplement: Supplementary file [file 18540236]

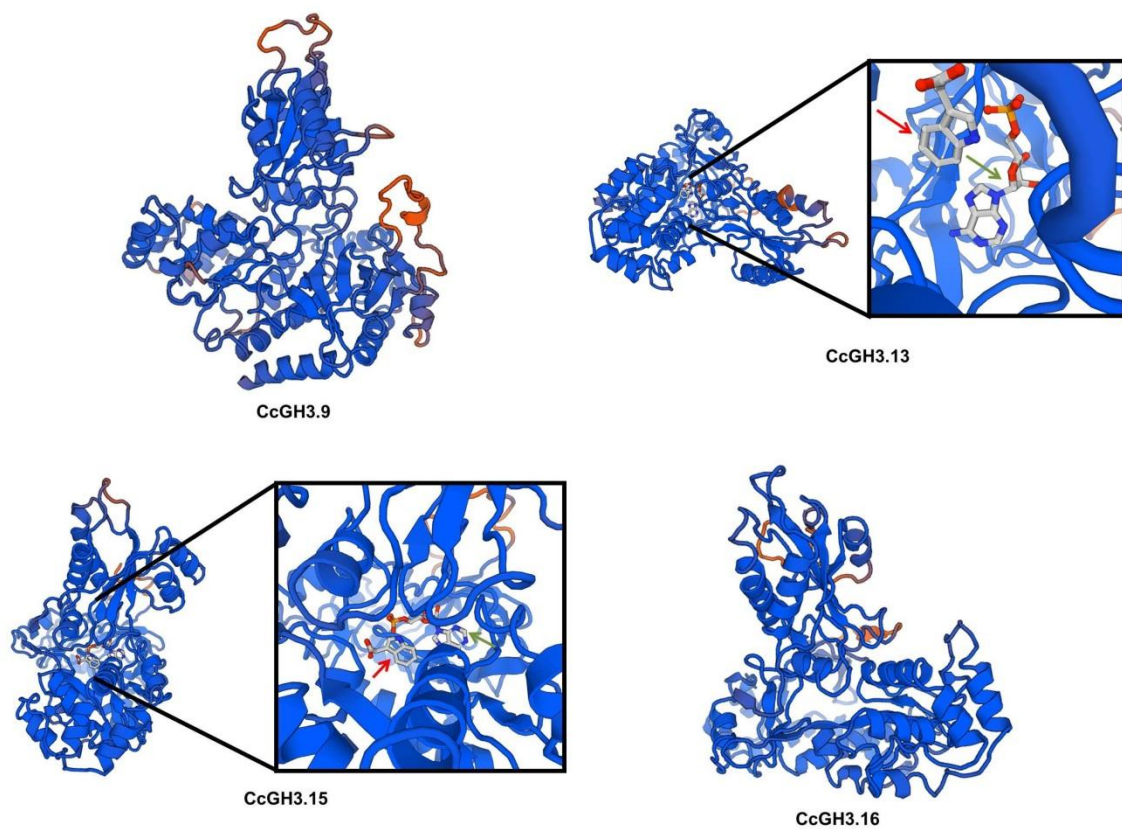

**Supplementary Figure S2.** Tridimensional structure model for the four GH3 proteins selected in *Coffea canephora*.
